# Supplementary material for: Bioorthogonal phase-directed copper-catalyzed azide–alkyne cycloaddition (PDCuAAC) coupling of selectively cross-linked superoxide dismutase dimers produces a fully active bis-dimer
Source: Royal Society of Chemistry journal article supplement (doi:10.1039/c5ob01702e), 2015-01-01
Supplement: c5ob01702e1.pdf [file c5ob01702e1.pdf]

## Supplemental Information

### Mass Spectrometry Data

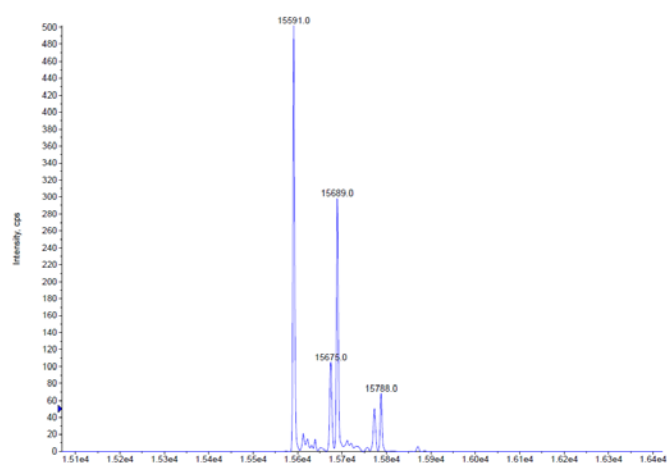

**Figure SI 1.** Deconvoluted mass spectrum indicating native SOD.  $[M+K+H]^+ = 15591$

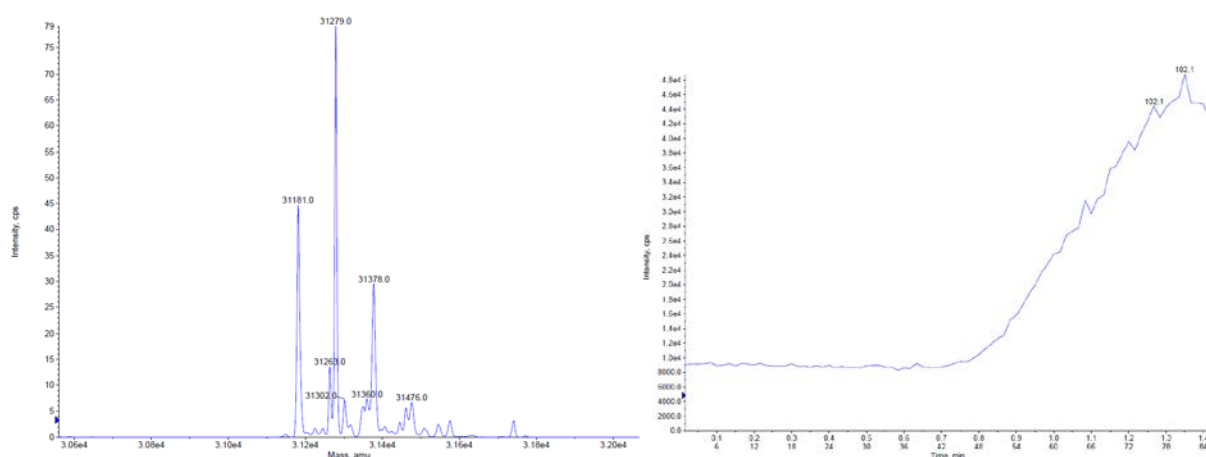

**Figure SI 2.** Deconvoluted mass spectrum indicating SOD-N<sub>3</sub> (left) and associated LC-MS chromatogram run by desalt column (right).  $[M+4H]^+ = 31279$  (ionization cleaves the cross-linker C<sub>Ar</sub>-N bond)

ATKAVCVLKGDGPVQGTIHFEAKGDTVVVTGSITGLTEGDHGFHVHQFGDNTQGCTSA GPHFNPLSKKHGGPKDEER  
HVGDLGNVTADKNGVAIVDIVDPLISLSGEYSIIIGRTM VVHEKPDDLGRGGNEESTKTGNAGSRLACGVIGIAK

**Figure SI 3.** Peptide sequence for bovine SOD1 from uniprot.org (P00442 SODC\_BOVIN).

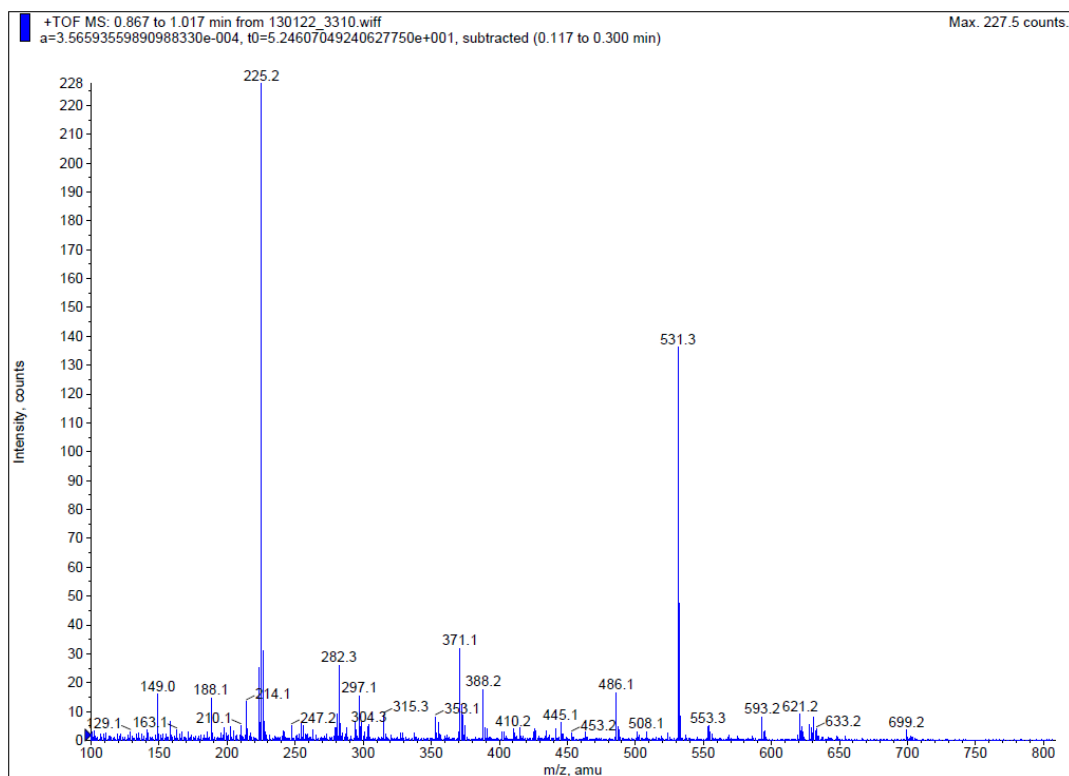

**Figure SI 4.** Evidence for two triazoles forming under the phase-directed copper-catalyzed azide-alkyne cycloaddition (PDCuAAC) conditions. Benzyl azide was reacted with alkyne **2** under the conditions of the PDCuAAC reaction. ESIMS calcd for  $C_{32}H_{26}N_8O_4S$   $[M+3H]^+$ : 621.2, found 621.2.
